# Supplementary material for: Controlled generation of peracetic acid atmospheres for the evaluation of chemical samplers
Source: Royal Society of Chemistry journal article supplement (doi:10.1039/d1ay00958c), 2021-01-01
Supplement: d1ay00958c1.pdf [file d1ay00958c1.pdf]

## Controlled Generation of Peracetic Acid Atmospheres for the Evaluation of Chemical Samplers

Amos Doepke<sup>1</sup>, Angela L. Stastny<sup>1</sup>, and Robert P. Streicher<sup>1</sup>

### Supplementary Materials

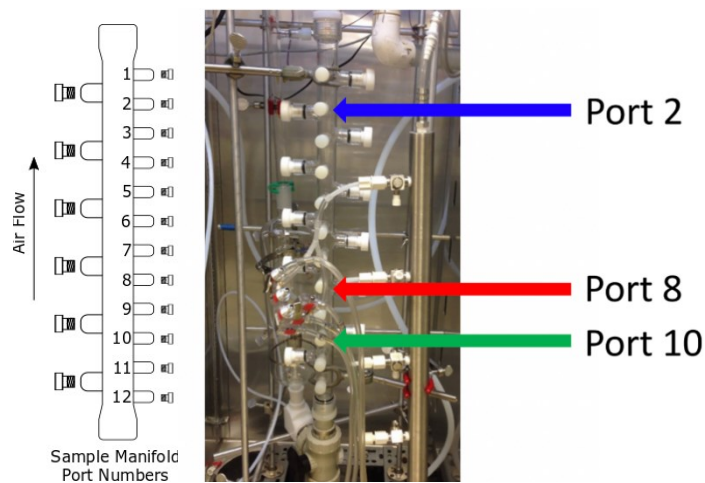

Figure S1. Column (2.5 cm internal diameter with a length of 61 cm) in atmosphere generator showing the location of the port numbers used in Table 1.

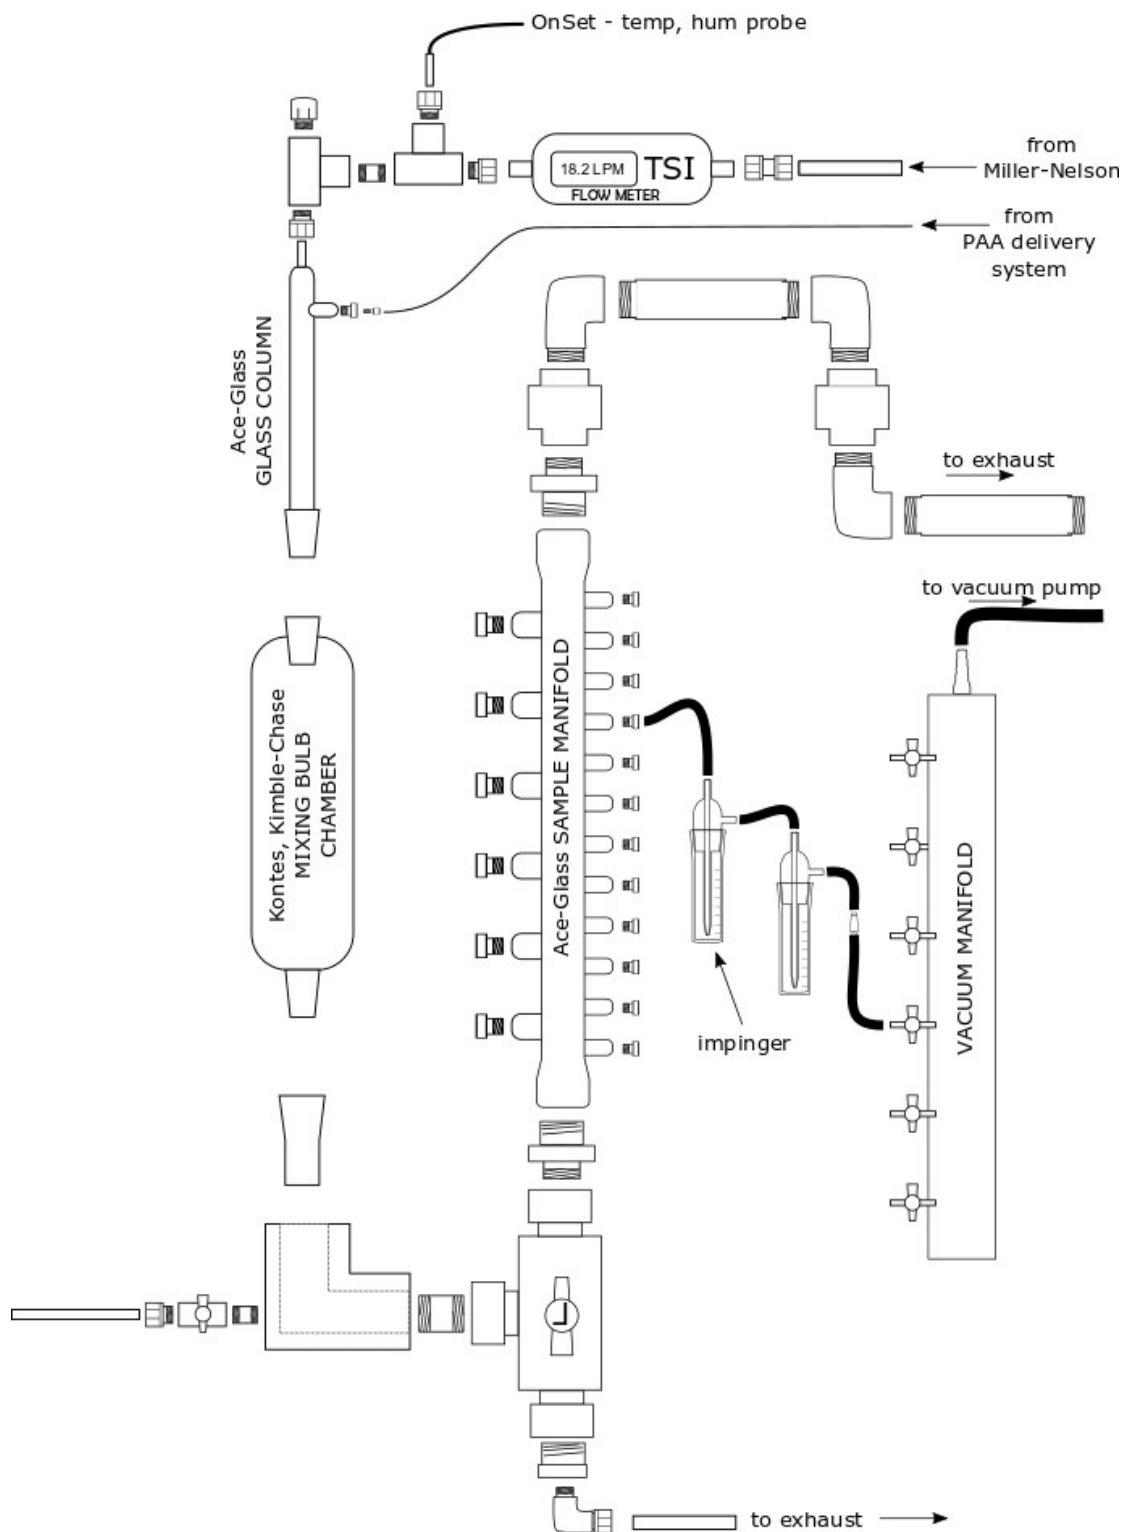

Figure S2. A diagram of the components of the atmosphere generation system located inside of the environmental chamber.

The environmental chamber inner dimensions were 149 cm tall, 74 cm deep and 57 cm wide with an interior volume of 630 liters. The sampling manifold tube is 2.5 cm diameter with a length of 61 cm. While the block diagram in the supplementary information is not to scale, the components are roughly proportional. The cabinet size allows for placement of samplers inside the chamber so that the atmosphere and the samplers all can be maintained at the same temperature.
